# Supplementary material
Source: bioRxiv or medRxiv preprint supplement (https://medrxiv.org/highwire/filestream/96943/field_highwire_adjunct_files/4/2019.12.23.19014407-3.pdf)

# Correlation

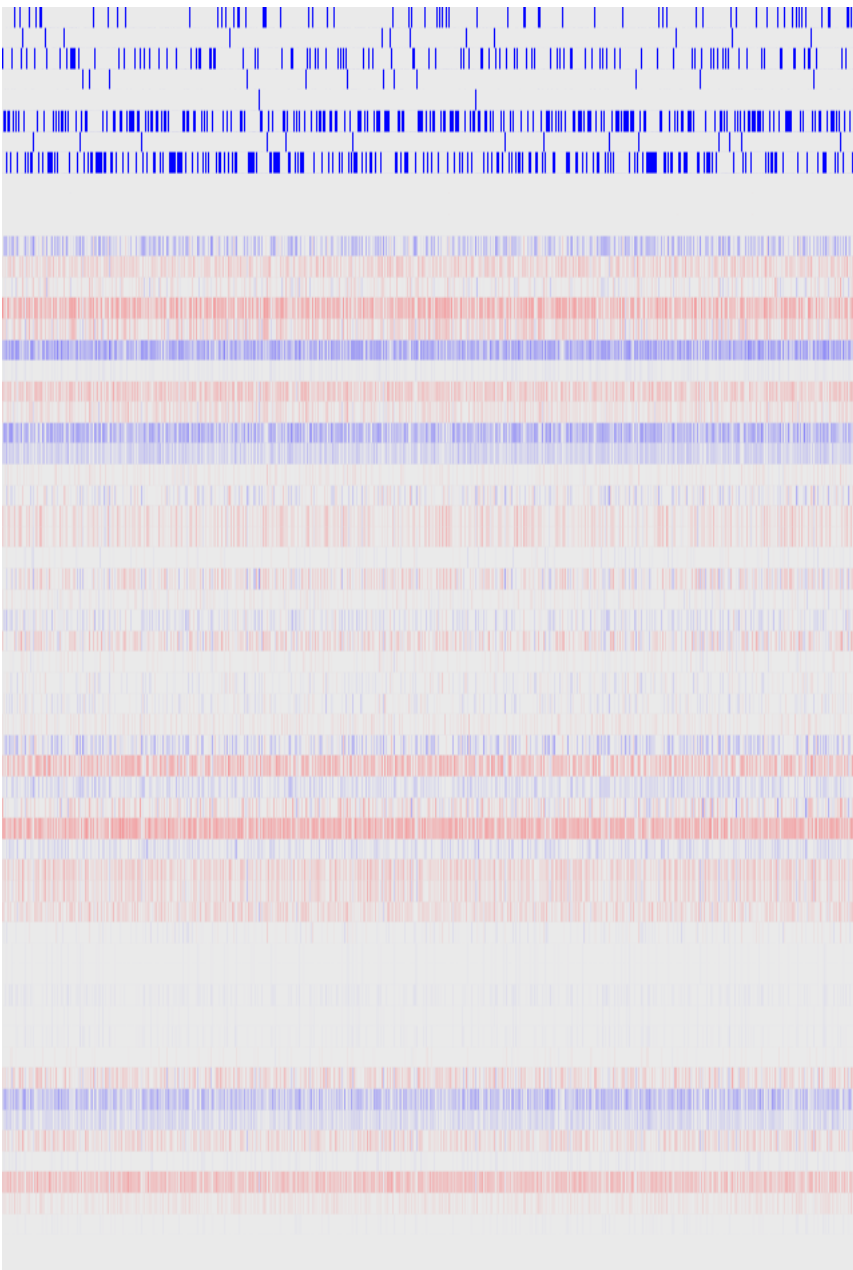

Language  
Verbal Fluency  
Executive  
Memory  
Visuospatial  
ALS-Specific  
ALS-NonSpecific  
ECAS Total  
ALSFRS-R

UMN

LMN

rs11185393

rs2068667

rs515342

rs9820623

rs13079368

rs1768208

rs757651

rs3828599

rs17111695

rs538622

rs10488631

rs7813314

rs10511816

rs3849943

rs3849942

rs13302855

rs10869188

rs870901

rs732389

rs7118388

rs12803540

rs17446243

rs1578303

rs10492593

rs12886280

rs6603044

rs739439

rs2285642

rs7224296

rs2240601

rs4239633

rs12608932

rs10463311

rs17070492

rs117027576

rs118082508

rs113247976

rs116900480

rs142321490

rs74654358

rs10139154

rs10143310

rs9901522

rs12973192

rs75087725

Sex

C9ORF72

Other Mutation

Principal Component 1

Principal Component 2

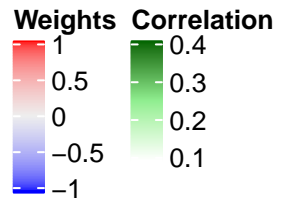

Supplement: Supplementary file [file 2019.12.23.19014407-3.pdf]
